# Supplementary material for: Gab2 mediates hepatocellular carcinogenesis by integrating multiple signaling pathways
Source: PubMed Central journal article supplement (PMC5690380; doi:10.1096/fj.201700120rr), 2017-08-21
Supplement: supp_fj.201700120RR_Supplemental_Data.pdf [file supp_fj.201700120RR_Supplemental_Data.pdf]

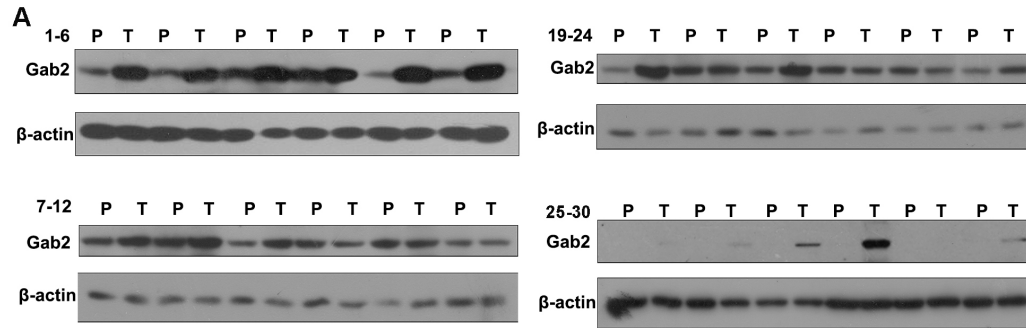

**Supplementary Figure 1**

**Supplementary Figure 1 Gab2 protein expression was up-regulated in HCC samples. (A)** The expression of Gab2 was detected in 30 HCC patients by western blotting. P, para-carcinoma. T, Tumor.

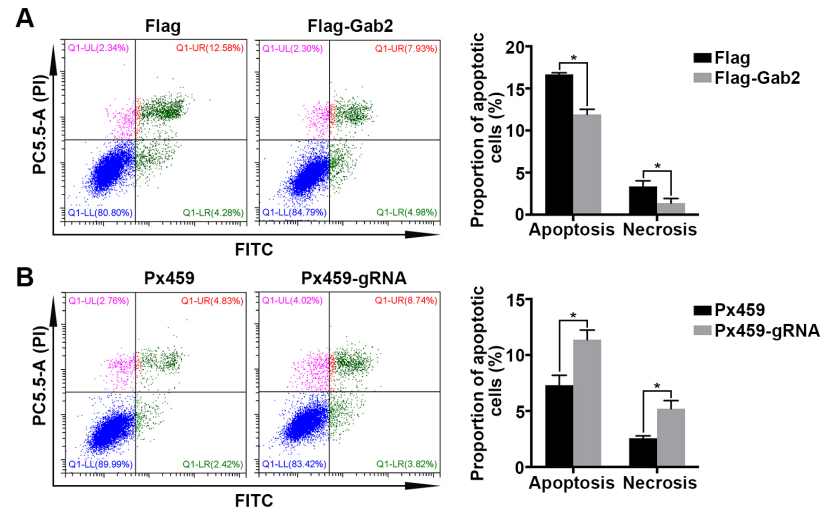

**Supplementary Figure 2**

**Supplementary Figure 2 Effects of Gab2 on cell apoptosis of HepG2.** (A) The number and proportion of apoptotic cells in Flag and Flag-Gab2 group cells. (B) The number and proportion of apoptotic cells in Px459 and Px459-gRNA group cells. \*  $P < 0.05$ .

**Supplementary Table 1. Description of primers used for qRT-PCR**

| <b>Gene</b>         | <b>Sense primer(5'-3')</b>   | <b>Antisense primer(5'-3')</b>  |
|---------------------|------------------------------|---------------------------------|
| <b><i>Human</i></b> |                              |                                 |
| <i>c-Myc</i>        | 5'-GGCTCCTGGCAAAGGTCA-3'     | 5'-CTGCGTAGTTGTGCTGATGT-3'      |
| <i>Bcl-2</i>        | 5'-GGTGGGGTCATGTGTGTGG-3'    | 5'-CGGTTCAAGGTA CT CAGTCATCC-3' |
| <i>MMP7</i>         | 5'-GAGTGAGCTACAGTGGGAACA-3'  | 5'-CTATGACGCGGGAGTTTAAACAT-3'   |
| <i>Gapdh</i>        | 5'-GGAGCGAGATCCCTCCAAAAT-3'  | 5'-GGCTGTTGTCATACTTCTCATGG-3'   |
| <b><i>Mouse</i></b> |                              |                                 |
| <i>c-Myc</i>        | 5'-CCCTATTTTCATCTGCGACGAG-3' | 5'-GAGAAGGACGTAGCGACCG-3'       |
| <i>Bcl-2</i>        | 5'-GCTACCGTCGTGACTTCGC-3'    | 5'-CCCCACCGAACTCAAAGAAGG-3'     |
| <i>MMP7</i>         | 5'-TCGCAAGGAGAGATCATGGAG-3'  | 5'-CTGCGTCCTCACCATCAGTC-3'      |
| <i>CyclinD1</i>     | 5'-TGACTGCCGAGAAGTTGTGC-3'   | 5'-CTCATCCGCCTCTGGCATT-3'       |
| <i>Gapdh</i>        | 5'-GGTGAAGGTCGGTGTGAACG-3'   | 5'-CTCGCTCCTGGAAGATGGTG-3'      |
